# Supplementary material
Source: Research Square preprint supplement (doi:10.21203/rs.3.rs-9896376/v1)
Supplement: Supplementary file 1 [file 4f6ef0449a4dc1beb650d48c.pdf]

**Supplementary table S1.** Renal superpanel – broadPanelApp genes (293). Variants of genes with a high level of evidence labelled “green” in Panel App were selected. Seventy genes with well-defined AD and XLD inheritance patterns were filtered for downstream analyses.

|         |         |        |         |          |          |          |          |        |         |
|---------|---------|--------|---------|----------|----------|----------|----------|--------|---------|
| CASR    | CFHR1   | COL4A3 | COL4A4  | COL4A5   | EYA1     | FAM58A   | FGA      | FLCN   | GATA3   |
| GLA     | GLI3    | GNA11  | HNF1B   | HNF4A    | JAG1     | KMT2D    | LMX1B    | MYH9   | MYOCD   |
| NR3C1   | PAX2    | PBX1   | PHEX    | PKD1     | PKD2     | PRKCSH   | REN      | RET    | ROBO2   |
| SLC4A1  | TBC1D8B | TRPC6  | TSC1    | TSC2     | TTR      | UMOD     | WNK4     | WT1    | ZMYM2   |
| ACTG2   | ACTN4   | ALG5   | AP2S1   | ATP1A1   | BNC2     | CFHR5    | CHD7     | CNNM2  | COL4A1  |
| CUL3    | GANAB   | GREB1L | GSN     | HOXA13   | KCNJ5    | KDM6A    | MUC1     | NIPBL  | NOTCH2  |
| NR3C2   | RRAGD   | SALL1  | SEC61A1 | SEC63    | SIX5     | TBX18    | TFAP2A   | TRIM8  | WBP11   |
| ACE     | AGT     | AGTR1  | AGXT    | AHI1     | ALG9     | ALMS1    | AMN      | ANKS6  | ANOS1   |
| APOC2   | APOE    | APRT   | ARHGDI1 | ARL13B   | ARL6     | ATP6V0A4 | ATP6V1B1 | AVPR2  | B9D2    |
| BBS1    | BBS10   | BBS12  | BBS2    | BBS4     | BBS5     | BBS7     | BBS9     | BSND   | C5orf42 |
| CA2     | CC2D2A  | CD151  | CENPF   | CEP104   | CEP164   | CEP290   | CEP41    | CEP55  | CEP83   |
| CHRM3   | CHRNA3  | CLCN5  | CLCNKB  | CLDN10   | CLDN16   | CLDN19   | COQ2     | COQ6   | COQ8B   |
| CRB2    | CSPP1   | CTNS   | CTU2    | CUBN     | CYP11B2  | CYP17A1  | CYP24A1  | DAAM2  | DDX59   |
| DGKE    | DHCR7   | DLG5   | DYNC2H1 | DZIP1L   | FAH      | FAM20A   | FAN1     | FAT1   | FRAS1   |
| FREM2   | GLIS2   | GON7   | GPC3    | GRHPR    | GRIP1    | HAAO     | HOGA1    | HPRT1  | HPSE2   |
| HSD11B2 | HYLS1   | IFT122 | IFT172  | IFT27    | IFT43    | INPP5E   | INVS     | IQCB1  | ITGA3   |
| ITGA8   | KCNJ1   | KCNJ10 | KCNJ16  | KIAA0586 | KIAA0753 | KIF7     | KYNU     | LAGE3  | LAMB2   |
| LCAT    | LIFR    | LRIG2  | LZTFL1  | MAGED2   | MAGI2    | MAPKBP1  | MKKS     | MKS1   | MMACHC  |
| MOCOS   | MTX2    | MYO1E  | NADSYN1 | NOS1AP   | NPHP1    | NPHP3    | NPHP4    | NPHS1  | NPHS2   |
| NUP107  | NUP133  | NUP85  | NUP93   | OCRL     | OSGEP    | PDSS2    | PKHD1    | PLCE1  | PLVAP   |
| PMM2    | PRDM15  | PSKH1  | RMND1   | ROBO1    | RPGRIP1L | RRM2B    | SARS2    | SCARB2 | SDCCAG8 |

|        |         |          |          |         |         |          |         |         |        |
|--------|---------|----------|----------|---------|---------|----------|---------|---------|--------|
| SGPL1  | SLC12A1 | SLC12A3  | SLC22A12 | SLC34A3 | SLC4A4  | SMARCAL1 | STRA6   | STRADA  | TCTN1  |
| TCTN2  | TCTN3   | TMEM107  | TMEM138  | TMEM216 | TMEM231 | TMEM237  | TMEM260 | TMEM67  | TNS2   |
| TP53RK | TPRKB   | TRAF3IP1 | TRAP1    | TRPM6   | TTC8    | TULP3    | TXNDC15 | VIPAS39 | VPS33B |
| WDPCP  | WDR19   | WDR35    | WDR60    | WDR72   | WDR73   | XDH      | XPNPEP3 | YRDC    | ZIC3   |
| ALG8   | APOA1   | APOA2    | AQP2     | C3      | CD46    | CFB      | CFH     | CFHR2   | CFHR3  |
| CFI    | CYP11B1 | DLC1     | DNAJB11  | DSTYK   | FN1     | FREM1    | GATM    | ICK     | IFT140 |
| INF2   | ITSN1   | KLHL3    | LRP4     | LYZ     | MT-TF   | NEK8     | OFD1    | PODXL   | ROR2   |
| SCNN1A | SCNN1B  | SCNN1G   | SLC2A2   | SLC2A9  | SLC34A1 | SLC3A1   | SLC5A2  | SLC7A9  | TBC1D1 |
| TTC21B | VHL     | WNK1     |          |         |         |          |         |         |        |
