# Supplementary material
Source: Research Square preprint supplement (doi:10.21203/rs.3.rs-9896376/v1)
Supplement: Supplementary file 2 [file 9f0f238bd68c133c630016e9.pdf]

**Supplementary Table S2.** Table listing the CDK genes with variants, zygosity, Clin Var classification, OMIM inheritance, sex, age and Allele Frequency (AF, source: gnomAD). “Variants highlighted in the same color co-occur in the same patients, suggesting digenic inheritance”.

| <i>GENE</i>              | <i>POSITION<br/>hg19</i> | <i>TRANSCRIPT: VARIENT</i>                  | <i>PROTEIN CHANGE</i> | <i>ZYGOSITY</i> | <i>CLINVAR</i> | <i>OMIM</i> | <i>SEX</i> | <i>Age</i> | <i>AF</i> |
|--------------------------|--------------------------|---------------------------------------------|-----------------------|-----------------|----------------|-------------|------------|------------|-----------|
| <i>CASR</i>              | 121976118                | NM_000388.4:c.376G>C                        | p.Asp126His           | Heterozygosity  | LP             | AD          | F          | 57         | 0.000000% |
| <i>CASR</i>              | 121976155                | NM_000388.4:c.413C>G                        | p.Thr138Arg           | Heterozygosity  | LP             | AD          | M          | 26         | 0.000000% |
| <i>CASR</i>              | 121980495                | NM_000388.4:c.613C>T                        | p.Arg205Cys           | Heterozygosity  | LP             | AD          | M          | 53         | 0.001627% |
| <i>CASR</i>              | 121980727                | NM_000388.4:c.845A>G                        | p.Glu282Gly           | Heterozygosity  | LP             | AD          | F          | 74         | 0.001415% |
| <i>CASR</i>              | 121980727                | NM_000388.4:c.845A>G                        | p.Glu282Gly           | Heterozygosity  | LP             | AD          | M          | 88         | 0.001415% |
| <i>CASR</i>              | 121981016                | NM_000388.4:c.1134A>T                       | p.Glu378Asp           | Heterozygosity  | LP             | AD          | M          | 1          | 0.000000% |
| <i>CASR</i>              | 121994759                | NM_000388.4:c.1478A>G                       | p.Asn493Ser           | Heterozygosity  | LP             | AD          | F          | 56         | 0.001053% |
| <i>CASR</i>              | 121994759                | NM_000388.4:c.1478A>G                       | p.Asn493Ser           | Heterozygosity  | LP             | AD          | F          | 28         | 0.001053% |
| <i>CASR</i>              | 121994759                | NM_000388.4:c.1478A>G                       | p.Asn493Ser           | Heterozygosity  | LP             | AD          | M          | 68         | 0.001053% |
| <i>CASR</i>              | 122002641                | NM_000388.4:c.1840A>T                       | p.Ile614Phe           | Heterozygosity  | LP             | AD          | M          | 76         | 0.000707% |
| <i>CASR</i>              | 122002641                | NM_000388.4:c.1840A>T                       | p.Ile614Phe           | Heterozygosity  | LP             | AD          | F          | 51         | 0.000707% |
| <i>CASR</i>              | 122002641                | NM_000388.4:c.1840A>T                       | p.Ile614Phe           | Heterozygosity  | LP             | AD          | M          | NA         | 0.000707% |
| <i>CASR</i>              | 122002956                | NM_000388.4:c.2160dupG                      | p.Leu721fs            | Heterozygosity  | P              | AD          | M          | 16         | 0.000000% |
| <i>CCNQ<br/>(FAM58A)</i> | 152864477                | NM_152274.5:c.31_49delGCAGCGCGGGGCCCGGAGGGC | p.Ala11fs             | Hemizyosity     | P              | XLD         | M          | 4          | 0.000000% |
| <i>CFHR1</i>             | 196795975                | NM_002113.3:c.273delT                       | p.Phe91fs             | Heterozygosity  | LP             | AD          | M          | 55         | 0.000144% |
| <i>CFHR1</i>             | 196797238                | NM_002113.3:c.469_470delCA                  | p.His157fs            | Heterozygosity  | LP             | AD          | F          | 22         | 0.001048% |
| <i>CFHR1</i>             | 196797331                | NM_002113.3:c.563dupT                       | p.Met189fs            | Heterozygosity  | LP             | AD          | M          | 2          | 0.001083% |
| <i>CFHR1</i>             | 196801125                | NM_002113.3:c.989delG                       | p.Arg330fs            | Heterozygosity  | LP             | AD          | F          | 35         | 0.000000% |

|        |           |                                     |                      |                |    |     |   |    |           |
|--------|-----------|-------------------------------------|----------------------|----------------|----|-----|---|----|-----------|
| COL4A3 | 228029443 | NM_000091.5:c.1A>G                  | p.Met1?              | Heterozygosity | P  | AD  | F | 52 | 0.000000% |
| COL4A3 | 228128558 | NM_000091.5:c.1213G>T               | p.Glu405*            | Heterozygosity | P  | AD  | F | 65 | 0.000000% |
| COL4A3 | 228131750 | NM_000091.5:c.1450G>A               | p.Gly484Arg          | Heterozygosity | LP | AD  | M | 3  | 0.002806% |
| COL4A3 | 228131750 | NM_000091.5:c.1450G>A               | p.Gly484Arg          | Heterozygosity | LP | AD  | F | 28 | 0.002806% |
| COL4A3 | 228145303 | NM_000091.5:c.2371C>T               | p.Arg791*            | Heterozygosity | P  | AD  | F | 43 | 0.003188% |
| COL4A3 | 228147212 | NM_000091.5:c.2620G>A               | p.Gly874Arg          | Heterozygosity | P  | AD  | M | 58 | 0.000000% |
| COL4A3 | 228155571 | NM_000091.5:c.3180_3184delAGGTA     | p.Glu1060fs          | Heterozygosity | LP | AD  | M | 44 | 0.000000% |
| COL4A3 | 228158003 | NM_000091.4:c.3321_3329delAAGTCCTGG | p.Ser1108_Gly1110del | Heterozygosity | LP | AD  | M | 1  | 0.004332% |
| COL4A3 | 228158003 | NM_000091.4:c.3321_3329delAAGTCCTGG | p.Ser1108_Gly1110del | Heterozygosity | LP | AD  | F | 12 | 0.004332% |
| COL4A3 | 228158003 | NM_000091.5:c.3321_3329delAAGTCCTGG | p.Ser1108_Gly1110del | Heterozygosity | LP | AD  | M | 33 | 0.004332% |
| COL4A3 | 228162571 | NM_000091.5:c.3749delC              | p.Pro1250fs          | Heterozygosity | P  | AD  | M | 11 | 0.000071% |
| COL4A3 | 228172594 | NM_000091.5:c.4421T>C               | p.Leu1474Pro         | Heterozygosity | LP | AD  | F | 84 | 0.439608% |
| COL4A3 | 228173662 | NM_000091.5:c.4510T>C               | p.Phe1504Leu         | Heterozygosity | LP | AD  | F | 40 | 0.019390% |
| COL4A4 | 227915799 | NM_000092.5:c.3044G>A               | p.Gly1015Glu         | Heterozygosity | LP | AD  | M | 61 | 0.006010% |
| COL4A4 | 227915799 | NM_000092.5:c.3044G>A               | p.Gly1015Glu         | Heterozygosity | LP | AD  | M | 64 | 0.006010% |
| COL4A4 | 227917111 | NM_000092.5:c.2878G>A               | p.Gly960Arg          | Heterozygosity | LP | AD  | F | 74 | 0.000870% |
| COL4A4 | 227920687 | NM_000092.5:c.2690G>A               | p.Gly897Glu          | Heterozygosity | LP | AD  | M | 58 | 0.000248% |
| COL4A4 | 227924184 | NM_000092.5:c.2320G>C               | p.Gly774Arg          | Heterozygosity | LP | AD  | F | 70 | 0.004213% |
| COL4A4 | 227924262 | NM_000092.5:c.2242G>A               | p.Gly748Ser          | Heterozygosity | LP | AD  | F | 83 | 0.003206% |
| COL4A4 | 227924262 | NM_000092.5:c.2242G>A               | p.Gly748Ser          | Heterozygosity | LP | AD  | M | 80 | 0.003206% |
| COL4A4 | 227953412 | NM_000092.5:c.1580delG              | p.Gly527fs           | Heterozygosity | P  | AD  | M | 3  | 0.000658% |
| COL4A5 | 107802379 | NM_033380.3:c.227A>C                | p.Gln76Pro           | Hemizyosity    | LP | XLD | M | 9  | 0.000000% |
| COL4A5 | 107834287 | NM_033380.2:c.1166-1G>C             | NA                   | Heterozygosity | P  | XLD | F | 4  | 0.000000% |

|        |           |                                     |              |                |    |     |   |    |           |
|--------|-----------|-------------------------------------|--------------|----------------|----|-----|---|----|-----------|
| COL4A5 | 107842023 | NM_033380.3:c.1871G>A               | p.Gly624Asp  | Hemizygosity   | P  | XLD | M | 1  | 0.008743% |
| COL4A5 | 107842023 | NM_033380.3:c.1871G>A               | p.Gly624Asp  | Heterozygosity | LP | XLD | F | 34 | 0.008743% |
| COL4A5 | 107845160 | NM_033380.3:c.2088_2089insTCTCCTT   | p.Lys698fs   | Heterozygosity | P  | XLD | F | 67 | 0.000000% |
| COL4A5 | 107846275 | NM_033380.2:c.2228G>C               | p.Gly743Ala  | Hemizygosity   | LP | XLD | M | 4  | 0.000000% |
| COL4A5 | 107929327 | NM_033380.3:c.4283G>T               | p.Arg1428Leu | Heterozygosity | LP | XLD | F | 73 | 0.000000% |
| COL4A5 | 107930886 | NM_033380.3:c.4490A>T               | p.Tyr1497Phe | Heterozygosity | LP | XLD | F | 61 | 0.000000% |
| COL4A5 | 107938603 | NM_033380.3:c.4928C>T               | p.Thr1643Ile | Heterozygosity | LP | XLD | F | 56 | 0.000000% |
| EYA1   | 72111581  | NM_000503.6:c.1773C>G               | p.Tyr591*    | Heterozygosity | P  | AD  | M | NA | 0.000000% |
| FGA    | 155505965 | NM_000508.5:c.1912delA              | p.Thr638fs   | Heterozygosity | P  | AD  | F | 26 | 0.000657% |
| FGA    | 155506908 | NM_021871.4:c.1670_1673delCAAA      | p.Thr557fs   | Heterozygosity | P  | AD  | M | 4  | 0.000000% |
| FGA    | 155506928 | NM_021871.4:c.1653delT              | p.Gly552fs   | Heterozygosity | LP | AD  | F | 65 | 0.003407% |
| FGA    | 155506928 | NM_021871.4:c.1653delT              | p.Gly552fs   | Heterozygosity | P  | AD  | F | 52 | 0.003407% |
| FGA    | 155508049 | NM_021871.4:c.532C>T                | p.Arg178*    | Heterozygosity | P  | AD  | F | 63 | 0.000798% |
| FGA    | 155510652 | NM_021871.4:c.117delT               | p.Val40fs    | Heterozygosity | P  | AD  | F | 55 | 0.002830% |
| FGA    | 155510675 | NM_021871.4:c.94G>T                 | p.Gly32*     | Heterozygosity | P  | AD  | F | 78 | 0.000398% |
| FGA    | 155506928 | NM_000508.3:c.1653delT              | p.Ser551fs   | Heterozygosity | P  | AD  | F | 81 | 0.008678% |
| FLCN   | 17118340  | NM_144997.7:c.1496_1497delTG        | p.Val499fs   | Heterozygosity | P  | AD  | M | 53 | 0.000000% |
| FLCN   | 17119709  | NM_144997.7:c.1285delC              | p.His429fs   | Heterozygosity | P  | AD  | M | 12 | 0.001054% |
| FLCN   | 17127409  | NM_144997.7:c.445G>A                | p.Gly149Ser  | Heterozygosity | LP | AD  | F | 52 | 0.000683% |
| GATA3  | 8100451   | NM_001002295.2:c.426_433delGGGGGGCC | p.Gly143fs   | Heterozygosity | P  | AD  | F | 38 | 0.000000% |
| GATA3  | 8100550   | NM_001002295.2:c.524C>A             | p.Ser175*    | Heterozygosity | P  | AD  | M | 15 | 0.000000% |
| GLA    | 100655719 | NM_000169.3:c.574A>C                | p.Asn192His  | Hemizygosity   | LP | XLD | M | 54 | 0.000000% |
| GLA    | 100656740 | NM_000169.3:c.427G>A                | p.Ala143Thr  | Heterozygosity | LP | XLD | F | 67 | 0.050625% |

|       |           |                                    |                      |                |    |     |   |    |           |
|-------|-----------|------------------------------------|----------------------|----------------|----|-----|---|----|-----------|
| GLA   | 100656740 | NM_000169.3:c.427G>A               | p.Ala143Thr          | Hemizygosity   | LP | XLD | M | 36 | 0.050625% |
| GLA   | 100656740 | NM_000169.3:c.427G>A               | p.Ala143Thr          | Homozygosity   | LP | XLD | F | 33 | 0.050625% |
| GLA   | 100658833 | NM_000169.3:c.335G>A               | p.Arg112His          | Heterozygosity | P  | XLD | F | 73 | 0.001818% |
| GLA   | 100658833 | NM_000169.3:c.335G>A               | p.Arg112His          | Heterozygosity | P  | XLD | F | 46 | 0.001818% |
| GLA   | 100658833 | NM_000169.3:c.335G>A               | p.Arg112His          | Hemizygosity   | P  | XLD | M | 54 | 0.001818% |
| GLA   | 100658833 | NM_000169.3:c.335G>A               | p.Arg112His          | Heterozygosity | P  | XLD | F | 79 | 0.001818% |
| GLA   | 100662833 | NM_000169.3:c.59C>T                | p.Ala20Val           | Heterozygosity | LP | XLD | F | 27 | 0.000000% |
| GLI3  | 42005105  | NM_000168.6:c.3566delG             | p.Arg1189fs          | Heterozygosity | P  | AD  | F | 39 | 0.000000% |
| GLI3  | 42007251  | NM_000168.6:c.2374C>T              | p.Arg792*            | Heterozygosity | P  | AD  | M | 1  | 0.000398% |
| GLI3  | 42018223  | NM_000168.6:c.1621_1622delAC       | p.Thr541fs           | Heterozygosity | P  | AD  | F | 4  | 0.000000% |
| GLI3  | 42018223  | NM_000168.6:c.1621_1622delAC       | p.Thr541fs           | Heterozygosity | P  | AD  | F | 1  | 0.000000% |
| GNA11 | 3113443   | NM_002067.5:c.437A>T               | p.Asp146Val          | Heterozygosity | LP | AD  | F | 46 | 0.000000% |
| HNF1B | 36091704  | NM_000458.4:c.927C>A               | p.Phe309Leu          | Heterozygosity | LP | AD  | F | 79 | 0.000000% |
| HNF1B | 36099623  | NM_000458.4:c.352C>G               | p.Pro118Ala          | Heterozygosity | LP | AD  | M | 1  | 0.000000% |
| HNF4A | 43034772  | NM_000457.5:c.190G>A               | p.Gly64Arg           | Heterozygosity | P  | AD  | F | 90 | 0.000479% |
| HNF4A | 43042354  | NM_000457.5:c.406C>T               | p.Arg136Trp          | Heterozygosity | P  | AD  | F | 66 | 0.011527% |
| HNF4A | 43048453  | NM_000457.5:c.829C>T               | p.Gln277*            | Heterozygosity | P  | AD  | F | 52 | 0.000000% |
| JAG1  | 10629364  | NM_000214.3:c.1402G>A              | p.Val468Ile          | Heterozygosity | LP | AD  | F | 84 | 0.000000% |
| JAG1  | 10632303  | NM_000214.3:c.1046G>A              | p.Gly349Asp          | Heterozygosity | LP | AD  | F | 73 | 0.000000% |
| JAG1  | 10632835  | NM_000214.3:c.949_950delCC         | p.Pro317fs           | Heterozygosity | P  | AD  | M | 5  | 0.000000% |
| KMT2D | 49420213  | NM_003482.4:c.15536G>A             | p.Arg5179His         | Heterozygosity | P  | AD  | F | 1  | 0.000000% |
| KMT2D | 49425823  | NM_003482.4:c.12659_12664dupAGCAGC | p.Gln4220_Gln4221dup | Heterozygosity | LP | AD  | F | 12 | 0.000000% |
| KMT2D | 49438030  | NM_003482.4:c.5141C>T              | p.Pro1714Leu         | Heterozygosity | LP | AD  | F | 50 | 0.000000% |

|              |           |                                     |                            |                |    |     |    |    |           |
|--------------|-----------|-------------------------------------|----------------------------|----------------|----|-----|----|----|-----------|
| <i>KMT2D</i> | 49440471  | NM_003482.4:c.4331_4339delTCTGTGATG | p.Leu1444_Asp1447delinsHis | Heterozygosity | LP | AD  | NA | NA | 0.000000% |
| <i>KMT2D</i> | 49440507  | NM_003482.4:c.4303C>A               | p.Gln1435Lys               | Heterozygosity | LP | AD  | F  | 52 | 0.000000% |
| <i>LMX1B</i> | 129377759 | NM_001174147.2:c.237G>T             | p.Glu79Asp                 | Heterozygosity | LP | AD  | F  | 65 | 0.000000% |
| <i>LMX1B</i> | 129455552 | NM_001174147.2:c.691C>T             | p.Arg231*                  | Heterozygosity | P  | AD  | F  | 84 | 0.000000% |
| <i>LMX1B</i> | 129456037 | NM_001174147.2:c.832G>A             | p.Ala278Thr                | Heterozygosity | LP | AD  | F  | 59 | 0.000000% |
| <i>MYH9</i>  | 36680216  | NM_002473.6:c.5687_5688delTG        | p.Leu1896fs                | Heterozygosity | P  | AD  | M  | 51 | 0.000000% |
| <i>MYOCD</i> | 12659780  | NM_001146312.1:c.2109delC           | p.Ser703fs                 | Heterozygosity | LP | AD  | F  | 11 | 0.000000% |
| <i>NR3C1</i> | 142780131 | NM_000176.3:c.274G>T                | p.Glu92*                   | Heterozygosity | LP | AD  | M  | 64 | 0.000000% |
| <i>NR3C1</i> | 142780131 | NM_000176.3:c.274G>T                | p.Glu92*                   | Heterozygosity | P  | AD  | F  | 69 | 0.000000% |
| <i>PAX2</i>  | 102509528 | NM_000278.5:c.76dupG                | p.Val26fs                  | Heterozygosity | P  | AD  | F  | 1  | 0.001237% |
| <i>PBX1</i>  | 164781344 | NM_002585.4:c.955C>T                | p.His319Tyr                | Heterozygosity | LP | AD  | M  | 6  | 0.000000% |
| <i>PBX1</i>  | 164789315 | NM_002585.4:c.1004C>G               | p.Ser335Cys                | Heterozygosity | LP | AD  | F  | 55 | 0.000000% |
| <i>PHEX</i>  | 22245724  | NM_000444.6:c.2066C>G               | p.Ala689Gly                | Hemizygosity   | LP | XLD | M  | 2  | 0.000000% |
| <i>PKD1</i>  | 2140150   | NM_001009944.3:c.12489_12490delTC   | p.Arg4164fs                | Heterozygosity | P  | AD  | F  | 50 | 0.000000% |
| <i>PKD1</i>  | 2141122   | NM_001009944.3:c.11766G>A           | p.Trp3922*                 | Heterozygosity | P  | AD  | M  | 50 | 0.000075% |
| <i>PKD1</i>  | 2143884   | NM_001009944.3:c.10748dupG          | p.Val3584fs                | Heterozygosity | P  | AD  | M  | 2  | 0.000000% |
| <i>PKD1</i>  | 2147189   | NM_001009944.3:c.10458_10459insGT   | p.Thr3487fs                | Heterozygosity | P  | AD  | F  | 3  | 0.000000% |
| <i>PKD1</i>  | 2147207   | NM_001009944.3:c.10441delG          | p.Val3481fs                | Heterozygosity | P  | AD  | F  | 32 | 0.000071% |
| <i>PKD1</i>  | 2150195   | NM_001009944.3:c.9683dupG           | p.Leu3229fs                | Heterozygosity | P  | AD  | M  | 8  | 0.000000% |
| <i>PKD1</i>  | 2153759   | NM_001009944.3:c.8299C>T            | p.Arg2767Cys               | Heterozygosity | LP | AD  | M  | 73 | 0.000000% |
| <i>PKD1</i>  | 2155412   | NM_001009944.3:c.7926dupA           | p.Arg2643fs                | Heterozygosity | P  | AD  | F  | 41 | 0.000000% |
| <i>PKD1</i>  | 2159531   | NM_001009944.3:c.5637C>A            | p.Tyr1879*                 | Heterozygosity | P  | AD  | F  | 38 | 0.000000% |
| <i>PKD1</i>  | 2160153   | NM_001009944.2:c.5014_5015delAG     | p.Arg1672fs                | Heterozygosity | P  | AD  | F  | 42 | 0.000000% |

|               |           |                                |             |                |    |    |   |    |           |
|---------------|-----------|--------------------------------|-------------|----------------|----|----|---|----|-----------|
| <i>PKD1</i>   | 2164490   | NM_001009944.3:c.2534T>C       | p.Leu845Ser | Heterozygosity | LP | AD | M | NA | 0.000435% |
| <i>PKD1</i>   | 2164490   | NM_001009944.3:c.2534T>G       | p.Leu845Trp | Heterozygosity | LP | AD | F | 50 | 0.000000% |
| <i>PKD1</i>   | 2165428   | NM_001009944.2:c.2048G>A       | p.Trp683*   | Heterozygosity | P  | AD | M | 33 | 0.000000% |
| <i>PKD1</i>   | 2165428   | NM_001009944.3:c.2048G>A       | p.Trp683*   | Heterozygosity | P  | AD | F | 50 | 0.000000% |
| <i>PKD1</i>   | 2166918   | NM_001009944.3:c.1522T>C       | p.Cys508Arg | Heterozygosity | LP | AD | F | 3  | 0.025965% |
| <i>PKD2</i>   | 88929127  | NM_000297.4:c.242C>A           | p.Ser81*    | Heterozygosity | P  | AD | M | 44 | 0.000000% |
| <i>PKD2</i>   | 88929231  | NM_000297.4:c.346delG          | p.Val116fs  | Heterozygosity | P  | AD | F | 65 | 0.000000% |
| <i>PKD2</i>   | 88959475  | NM_000297.4:c.916C>T           | p.Arg306*   | Heterozygosity | P  | AD | F | 10 | 0.000398% |
| <i>PKD2</i>   | 88959517  | NM_000297.4:c.958C>T           | p.Arg320*   | Heterozygosity | P  | AD | F | 65 | 0.000186% |
| <i>PKD2</i>   | 88959517  | NM_000297.4:c.958C>T           | p.Arg320*   | Heterozygosity | P  | AD | F | 60 | 0.000186% |
| <i>PKD2</i>   | 88959517  | NM_000297.4:c.958C>T           | p.Arg320*   | Heterozygosity | P  | AD | F | 58 | 0.000186% |
| <i>PKD2</i>   | 88967917  | NM_000297.4:c.1446_1449delCTTT | p.Phe482fs  | Heterozygosity | P  | AD | F | 46 | 0.000000% |
| <i>PRKCSH</i> | 11552071  | NM_001289104.2:c.374_375delAG  | p.Glu125fs  | Heterozygosity | P  | AD | F | 49 | 0.000812% |
| <i>PRKCSH</i> | 11559732  | NM_001289104.2:c.1290C>G       | p.Tyr430*   | Heterozygosity | P  | AD | M | 52 | 0.001193% |
| <i>REN</i>    | 204129720 | NM_000537.4:c.457_460delACAG   | p.Thr153fs  | Heterozygosity | LP | AD | M | 38 | 0.000000% |
| <i>REN</i>    | 204131245 | NM_000537.3:c.145C>T           | p.Arg49*    | Heterozygosity | P  | AD | M | 87 | 0.004469% |
| <i>REN</i>    | 204131263 | NM_000537.4:c.127C>T           | p.Arg43*    | Heterozygosity | P  | AD | M | 36 | 0.001611% |
| <i>RET</i>    | 43609103  | NM_020975.6:c.1859G>C          | p.Cys620Ser | Heterozygosity | P  | AD | M | 1  | 0.000000% |
| <i>RET</i>    | 43609943  | NM_020975.6:c.1895A>G          | p.Glu632Gly | Heterozygosity | LP | AD | M | 68 | 0.000000% |
| <i>RET</i>    | 43617415  | NM_020975.6:c.2752A>G          | p.Met918Val | Heterozygosity | P  | AD | M | 55 | 0.000000% |
| <i>ROBO2</i>  | 77629176  | NM_001378191.1:c.2467G>T       | p.Gly823*   | Heterozygosity | LP | AD | F | NA | 0.000000% |
| <i>SLC4A1</i> | 42328846  | NM_000342.4:c.2422C>G          | p.Arg808Gly | Heterozygosity | LP | AD | M | 3  | 0.000000% |
| <i>SLC4A1</i> | 42330696  | NM_000342.4:c.2101G>A          | p.Gly701Ser | Heterozygosity | LP | AD | M | 2  | 0.000620% |

|                |           |                              |              |                |    |     |   |    |           |
|----------------|-----------|------------------------------|--------------|----------------|----|-----|---|----|-----------|
| <i>SLC4A1</i>  | 42335888  | NM_000342.3:c.980C>A         | p.Pro327His  | Heterozygosity | LP | AD  | F | 64 | 0.000000% |
| <i>TBC1D8B</i> | 106065267 | NM_017752.3:c.421C>T         | p.Arg141*    | Heterozygosity | LP | XLD | F | 57 | 0.000662% |
| <i>TRPC6</i>   | 101341937 | NM_004621.6:c.2386C>T        | p.Gln796*    | Heterozygosity | P  | AD  | M | 29 | 0.000000% |
| <i>TRPC6</i>   | 101344331 | NM_004621.6:c.1918delA       | p.Ile640fs   | Heterozygosity | P  | AD  | M | 2  | 0.000000% |
| <i>TRPC6</i>   | 101362431 | NM_004621.6:c.983_984delTT   | p.Phe328fs   | Heterozygosity | P  | AD  | F | 26 | 0.000000% |
| <i>TRPC6</i>   | 101362435 | NM_004621.6:c.979_980insC    | p.Asp327fs   | Heterozygosity | P  | AD  | F | NA | 0.000000% |
| <i>TRPC6</i>   | 101362437 | NM_004621.6:c.977_978delAA   | p.Lys326fs   | Heterozygosity | P  | AD  | F | 1  | 0.000000% |
| <i>TSC1</i>    | 135781220 | NM_000368.5:c.1744_1745insAA | p.Thr582fs   | Heterozygosity | P  | AD  | F | 1  | 0.000000% |
| <i>TSC1</i>    | 135787701 | NM_000368.4:c.881C>A         | p.Thr294Asn  | Heterozygosity | LP | AD  | M | 15 | 0.000000% |
| <i>TSC1</i>    | 135797303 | NM_000368.5:c.566A>T         | p.His189Leu  | Heterozygosity | LP | AD  | M | 78 | 0.000000% |
| <i>TSC2</i>    | 2121892   | NM_000548.5:c.2054C>G        | p.Pro685Arg  | Heterozygosity | LP | AD  | F | 73 | 0.000000% |
| <i>TSC2</i>    | 2122258   | NM_000548.5:c.2114T>C        | p.Val705Ala  | Heterozygosity | LP | AD  | M | 62 | 0.000137% |
| <i>TSC2</i>    | 2129160   | NM_000548.5:c.3094C>G        | p.Arg1032Gly | Heterozygosity | LP | AD  | F | 52 | 0.000000% |
| <i>TSC2</i>    | 2129341   | NM_000548.5:c.3196C>G        | p.Leu1066Val | Heterozygosity | LP | AD  | F | 58 | 0.000000% |
| <i>TSC2</i>    | 2138123   | NM_000548.5:c.5143A>G        | p.Met1715Val | Heterozygosity | LP | AD  | F | 1  | 0.000000% |
| <i>TTR</i>     | 29172903  | NM_000371.4:c.114T>A         | p.Asp38Glu   | Heterozygosity | P  | AD  | F | 64 | 0.000000% |
| <i>TTR</i>     | 29172937  | NM_000371.4:c.148G>A         | p.Val50Met   | Heterozygosity | P  | AD  | M | 27 | 0.010153% |
| <i>TTR</i>     | 29172937  | NM_000371.4:c.148G>A         | p.Val50Met   | Heterozygosity | P  | AD  | F | 70 | 0.010153% |
| <i>TTR</i>     | 29172937  | NM_000371.4:c.148G>A         | p.Val50Met   | Heterozygosity | P  | AD  | M | 14 | 0.010153% |
| <i>TTR</i>     | 29175091  | NM_000371.4:c.209G>A         | p.Ser70Asn   | Heterozygosity | LP | AD  | M | 85 | 0.001921% |
| <i>TTR</i>     | 29175144  | NM_000371.4:c.262A>T         | p.Ile88Leu   | Heterozygosity | LP | AD  | M | 49 | 0.002165% |
| <i>TTR</i>     | 29178618  | NM_000371.4:c.424G>A         | p.Val142Ile  | Heterozygosity | LP | AD  | M | 2  | 0.088781% |
| <i>TTR</i>     | 29178618  | NM_000371.4:c.424G>A         | p.Val142Ile  | Heterozygosity | LP | AD  | M | 11 | 0.088781% |

|              |          |                                 |             |                |    |    |   |    |           |
|--------------|----------|---------------------------------|-------------|----------------|----|----|---|----|-----------|
| <i>TTR</i>   | 29178618 | NM_000371.4:c.424G>A            | p.Val142Ile | Heterozygosity | LP | AD | M | 61 | 0.088781% |
| <i>UMOD</i>  | 20360056 | NM_003361.4:c.567C>G            | p.Tyr189*   | Heterozygosity | LP | AD | F | 7  | 0.000574% |
| <i>UMOD</i>  | 20360310 | NM_003361.4:c.313G>C            | p.Gly105Arg | Heterozygosity | LP | AD | M | 1  | 0.000774% |
| <i>UMOD</i>  | 20360363 | NM_003361.4:c.260C>T            | p.Pro87Leu  | Heterozygosity | LP | AD | F | 62 | 0.000000% |
| <i>UMOD</i>  | 20360363 | NM_003361.4:c.260C>T            | p.Pro87Leu  | Heterozygosity | LP | AD | M | 61 | 0.000000% |
| <i>UMOD</i>  | 20360393 | NM_003361.4:c.230G>T            | p.Cys77Phe  | Heterozygosity | LP | AD | F | 67 | 0.000000% |
| <i>UMOD</i>  | 20360508 | NM_003361.4:c.115G>A            | p.Ala39Thr  | Heterozygosity | LP | AD | F | 13 | 0.000000% |
| <i>UMOD</i>  | 20360510 | NM_003361.4:c.113A>G            | p.Asn38Ser  | Heterozygosity | LP | AD | F | 54 | 0.000000% |
| <i>WNK4</i>  | 40932717 | NM_032387.5:c.1A>G              | p.Met1?     | Heterozygosity | LP | AD | F | 67 | 0.000000% |
| <i>WNK4</i>  | 40933065 | NM_032387.5:c.349A>T            | p.Lys117*   | Heterozygosity | P  | AD | F | 57 | 0.000000% |
| <i>WNK4</i>  | 40933065 | NM_032387.5:c.349A>T            | p.Lys117*   | Heterozygosity | P  | AD | F | 66 | 0.000000% |
| <i>WNK4</i>  | 40947945 | NM_032387.5:c.3326_3329delTG TG | p.Val1109fs | Heterozygosity | P  | AD | M | 8  | 0.000000% |
| <i>WT1</i>   | 32456813 | NM_024426.6:c.94C>T             | p.Gln32*    | Heterozygosity | P  | AD | F | 4  | 0.000000% |
| <i>ZMYM2</i> | 20567828 | NM_197968.4:c.617dupA           | p.Asp206fs  | Heterozygosity | LP | AD | F | 8  | 0.000000% |
| <i>ZMYM2</i> | 20625636 | NM_197968.4:c.235G>A            | p.Glu786Lys | Heterozygosity | LP | AD | F | 40 | 0.000000% |
